# Supplementary material
Source: Springer Nature journal article supplement (https://www.springermedizin.de/resource/supplementary/12888_2006_157_MOESM2_ESM.pdf/9482012)

10008 Descriptor for Item 8

Locn = -0.407

Unit = 1.236

FitRes = -3.275

ChiSq[Pr] = 0.002

SampleN = 316

Slope

0.40

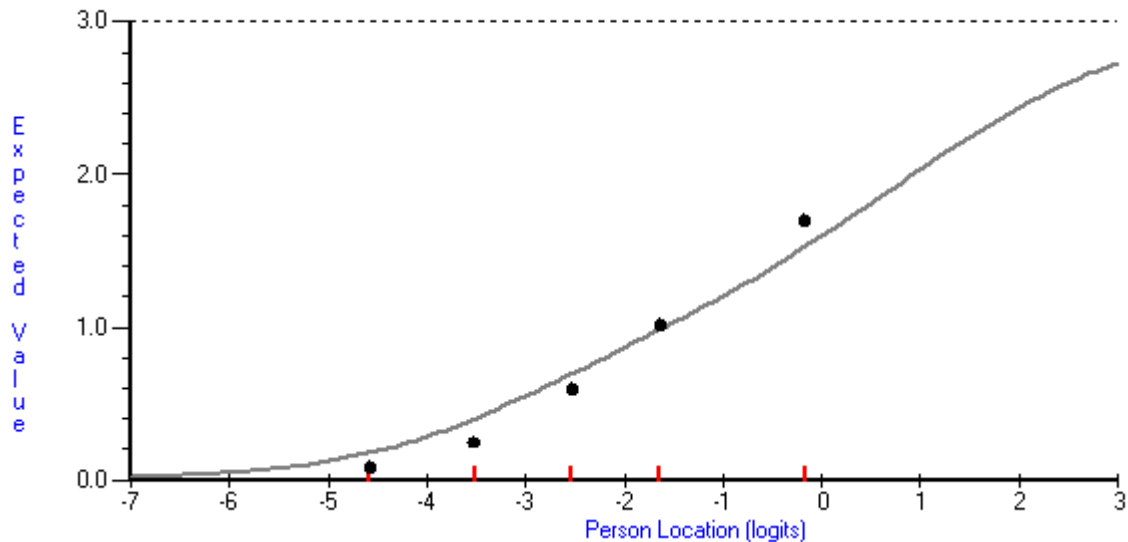

Supplement: MOESM2 [file 9482012]
